# Supplementary material
Source: PubMed Central journal article supplement (PMC9923616)
Supplement: PEDS_20133949SupplementaryData.pdf [file PEDS_20133949SupplementaryData.pdf]

## Supplemental Information

**SUPPLEMENTAL TABLE 7** CCHDs With Associated ICD-9-CM/BPA Codes

|                                                                           |                                        |
|---------------------------------------------------------------------------|----------------------------------------|
| Aortic arch atresia or hypoplasia without hypoplastic left heart syndrome | 747.20                                 |
| Aortic stenosis, valvar                                                   | 746.30                                 |
| Coarctation of the aorta                                                  | 747.10, 747.11, 747.12, 747.19         |
| Complete atrioventricular septal defect                                   | 745.62, 745.63                         |
| dextro-Transposition of the great arteries <sup>a</sup>                   | 745.10, 745.11                         |
| Double outlet right ventricle                                             | 745.185, 745.186, 745.188, 745.189     |
| Ebstein anomaly                                                           | 746.20                                 |
| Hypoplastic left heart syndrome <sup>a</sup>                              | 746.70                                 |
| Interrupted aortic arch                                                   | 747.215, 747.216, 747.217              |
| Pulmonary atresia with/without ventricular septal defect <sup>a</sup>     | 746.00, 746.03                         |
| Pulmonary valve stenosis                                                  | 746.01                                 |
| Single ventricle                                                          | 745.30, 745.31, 745.32, 745.33, 745.38 |
| Tetralogy of Fallot with/without pulmonary atresia <sup>a</sup>           | 745.20, 747.31                         |
| Total anomalous pulmonary venous return <sup>a</sup>                      | 747.42                                 |
| Tricuspid atresia <sup>a</sup>                                            | 746.10 (excludes 746.105, 746.106)     |
| Truncus arteriosus <sup>a</sup>                                           | 745.00                                 |

<sup>a</sup> Denotes primary target defect for pulse oximetry screening.
